# Supplementary material for: Metastatic Burden and TP53 Mutation Overshadow the Independent Prognostic Value of KRAS in Colorectal Cancer
Source: Research Square preprint supplement (doi:10.21203/rs.3.rs-8327424/v1), 2025-12-17
Supplement: Supplementary file 1 [file a49113d4c7606d471426f7fb.docx]

**Supplementary Materials:**

**Table S1.** Univariate Cox regression analysis on overall survival of all patients.

| **Characteristics** | ***P-value*** | **HR (95% CI)** |
| --- | --- | --- |
| Kras | 0.093 | 1.879 (0.9 ~ 3.922) |
| Age | 0.066 | 1.031 (0.998 ~ 1.066) |
| Gender | 0.496 | 1.285 (0.624 ~ 2.648) |
| Tumor location | 0.279 | 1.696 (0.651 ~ 4.417) |
| Differentiation | 0.342 | 0.687 (0.316 ~ 1.491) |
| T stage T1 | 0.828 | 0.735 (0.046 ~ 11.756) |
| T stage T2 | 0.481 | 0.422 (0.038 ~ 4.658) |
| T stage T3 | 0.694 | 1.496 (0.201 ~ 11.123) |
| T stage T4 | 0.417 | 2.403 (0.289 ~ 19.995) |
| N stage N1 | 0.001 | 4.484 (1.881 ~ 10.692) |
| N stage N2 | 0 | 7.39 (2.848 ~ 19.176) |
| M stage | 0 | 10.851 (5.314 ~ 22.159) |
| Cardiovascular disease | 0.72 | 1.243 (0.378 ~ 4.091) |
| Diabetes | 0.697 | 1.194 (0.49 ~ 2.91) |
| Chronic nephrosis | 0.997 | 0 (0 ~ Inf) |
| COPD | 0.998 | 0 (0 ~ Inf) |
| Hypertension | 0.967 | 0.985 (0.472 ~ 2.055) |
| Thrombocytosis | 0.848 | 0.87 (0.207 ~ 3.645) |
| Abnormal liver function | 0.565 | 1.247 (0.587 ~ 2.649) |
| Anemia | 0.418 | 0.732 (0.345 ~ 1.555) |
| Cardiac insufficiency | 0.847 | 1.099 (0.422 ~ 2.863) |
| BMI | 0.012 | 0.853 (0.754 ~ 0.965) |
| NRS2001 2 | 0.196 | 2.206 (0.664 ~ 7.328) |
| NRS2001 3 | 0.04 | 3.328 (1.059 ~ 10.453) |
| NRS2001 4 | 0.014 | 5.228 (1.403 ~ 19.478) |
| NRS2001 5 | 0.087 | 3.691 (0.826 ~ 16.495) |
| Obstruction | 0.074 | 2.152 (0.927 ~ 4.995) |
| Perforation | 0.144 | 1.944 (0.797 ~ 4.743) |
| Invagination | 0.996 | 0 (0 ~ Inf) |
| First CEA | 0.229 | 1.002 (0.999 ~ 1.005) |
| Ascites | 0.215 | 0.612 (0.282 ~ 1.329) |
| Enterostomy | 0.191 | 1.678 (0.773 ~ 3.645) |
| Extended combined resection | 0.001 | 3.619 (1.665 ~ 7.867) |
| Neoadjuvant therapy | 0 | 3.76 (1.824 ~ 7.75) |
| Targeted therapy | 0.001 | 3.199 (1.567 ~ 6.53) |
| TMB | 0.925 | 0.908 (0.124 ~ 6.669) |
| MSI | 0.925 | 0.908 (0.124 ~ 6.669) |
| Nras | 0.997 | 0 (0 ~ Inf) |
| BRAF V600E | 0.465 | 2.104 (0.287 ~ 15.44) |
| HER2 amplification | 0.998 | 0 (0 ~ Inf) |
| MLH1 germline | 0.998 | 0 (0 ~ Inf) |
| MSH2 germline | 0.997 | 0 (0 ~ Inf) |
| MSH6 germline | 0.997 | 0 (0 ~ Inf) |
| POLE | 0.412 | 0.435 (0.059 ~ 3.188) |
| POLD1 | 0.997 | 0 (0 ~ Inf) |
| DDR pathway | 0.934 | 0.957 (0.334 ~ 2.738) |
| ATM | 0.942 | 0.929 (0.127 ~ 6.817) |
| ATR | 0.997 | 0 (0 ~ Inf) |
| BAP1 | 0.38 | 2.446 (0.332 ~ 18.01) |
| BLM | 0.997 | 0 (0 ~ Inf) |
| BRCA1 | 0.997 | 0 (0 ~ Inf) |
| BRCA2 | 0.158 | 2.817 (0.67 ~ 11.849) |
| BRIP1 | 0.997 | 0 (0 ~ Inf) |
| CHEK1 | 0.091 | 5.588 (0.759 ~ 41.132) |
| CHEK2 | 0.997 | 0 (0 ~ Inf) |
| ERCC3 | 0.102 | 5.289 (0.719 ~ 38.892) |
| ERCC4 | 0.997 | 0 (0 ~ Inf) |
| ERCC5 | 0.997 | 0 (0 ~ Inf) |
| FANCA | 0.997 | 0 (0 ~ Inf) |
| FANCC | 0.997 | 0 (0 ~ Inf) |
| MER11A | 0.997 | 0 (0 ~ Inf) |
| NBN | 0.997 | 0 (0 ~ Inf) |
| RAD50 | 0.816 | 1.266 (0.172 ~ 9.305) |
| RAD51 | 0.998 | 0 (0 ~ Inf) |
| RAD51B | 0.997 | 0 (0 ~ Inf) |
| RAD51D | 0.997 | 0 (0 ~ Inf) |
| RAD54L | 0.997 | 0 (0 ~ Inf) |
| TP53 | 0.007 | 2.675 (1.31 ~ 5.463) |
| PTEN inactivating | 0.726 | 0.7 (0.095 ~ 5.136) |
| JAK1 inactivating | 0.364 | 2.519 (0.343 ~ 18.498) |
| JAK2 inactivating | 0.998 | 0 (0 ~ Inf) |
| B2M inactivating | 0.588 | 1.735 (0.236 ~ 12.736) |
| EGFR | 0.997 | 0 (0 ~ Inf) |
| HLA I germline genotyping homozygous | 0.053 | 0.243 (0.058 ~ 1.018) |
| HLA A homozygous | 0.105 | 0.193 (0.026 ~ 1.414) |
| HLA B homozygous | 0.476 | 0.484 (0.066 ~ 3.55) |
| HLA C homozygous | 0.227 | 0.293 (0.04 ~ 2.148) |

*Notes: Values of 0 or Inf indicate failure of model convergence due to limited event numbers.*
